# Supplementary material for: Genome-Wide Association Study for Udder Conformation Traits in Chinese Holstein Cattle
Source: MDPI journal article supplement (doi:10.3390/ani12192542), 2022-09-22

**Figure S1.** The distribution of the SNP information on 29 chromosomes within 1 Mb window size.

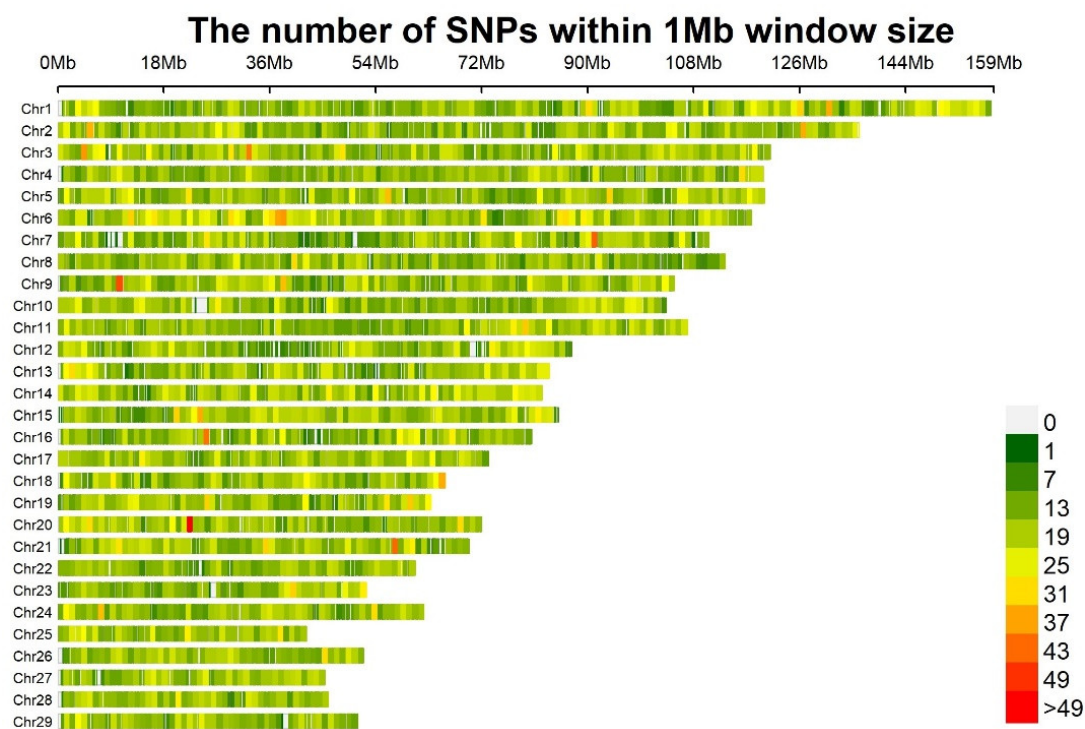

**Figure S2.** The distribution and correlation of the phenotypes among the udder structure traits in Chinese Holstein cattle.

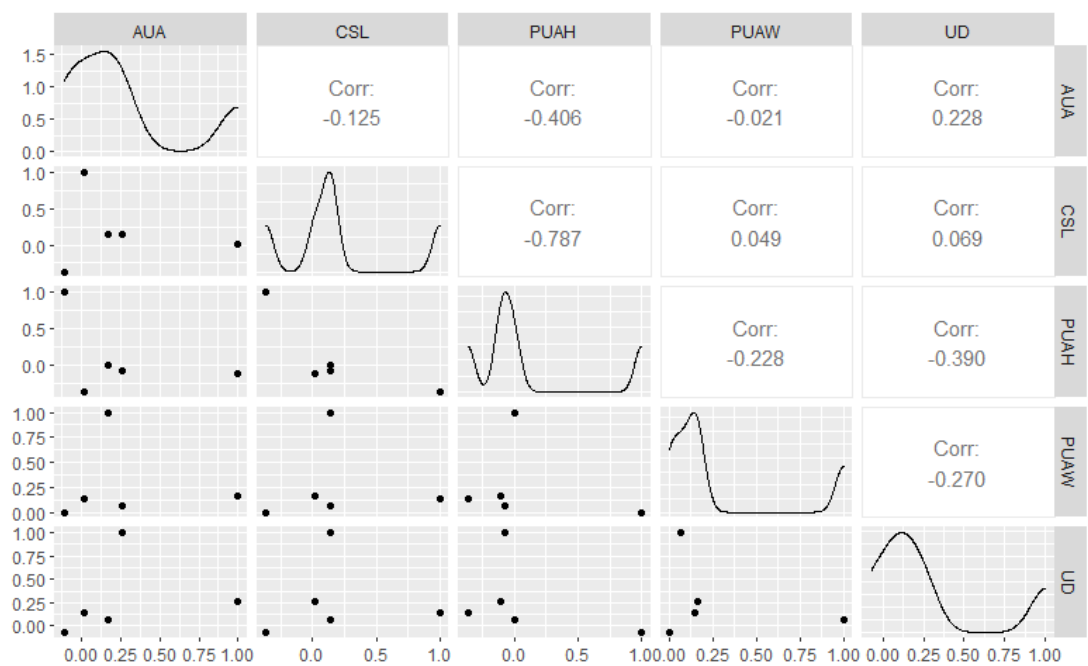

**Figure S3.** The genotypic correlation among the udder structure traits in Chinese Holstein Cattle.

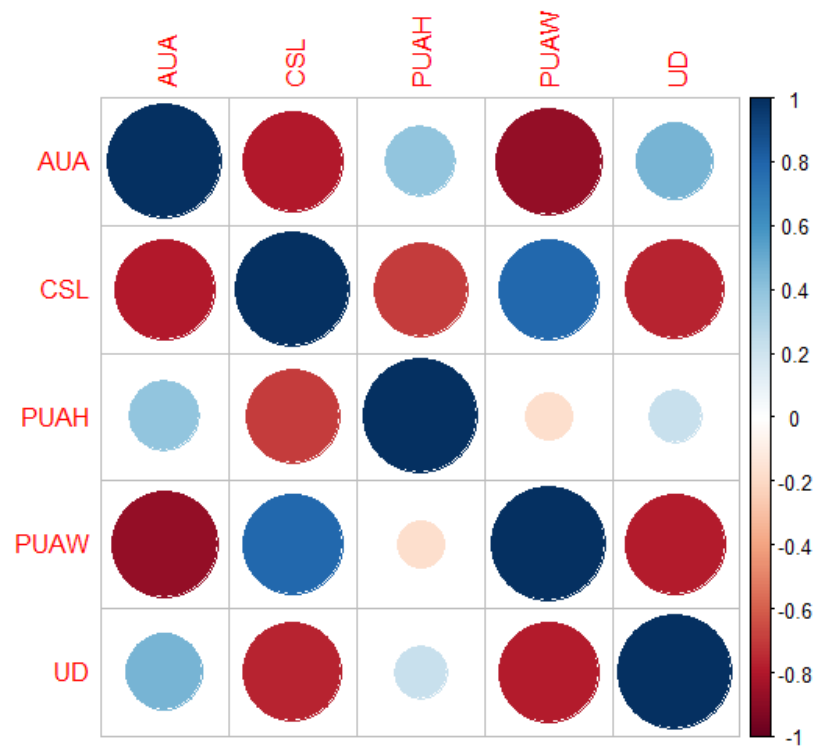

**Figure S4.** Kyoto encyclopedia of genes and genomes (KEGG) pathways analysis for udder structure conformation traits.

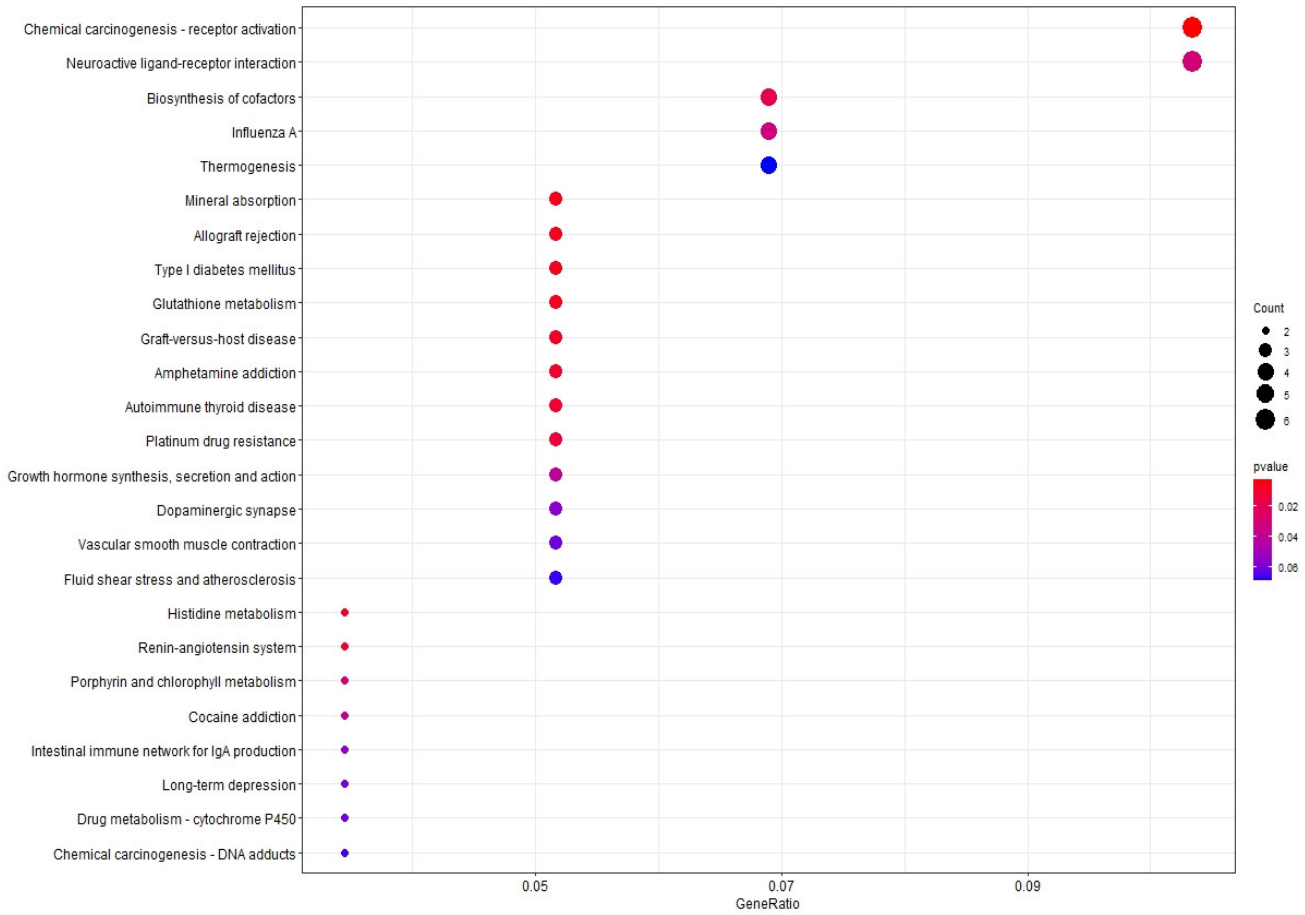

Supplement: s1 [file s1]
