# Supplementary material for: Genome-Wide Association Study for Udder Conformation Traits in Chinese Holstein Cattle
Source: Animals (Basel). 2022 Sep 22;12(19):2542. doi: 10.3390/ani12192542 (PMC9559277; doi:10.3390/ani12192542)
Supplement: Supplementary file 1 [file animals-12-02542-s001.zip › Gene Ontology Results - Table S1.xlsx]

## Sheet: Sheet1
Gene Ontology Terms
ID	Description	GeneRatio	BgRatio	adjusted p value	Gene Name	Count
GO:0060341	regulation of cellular localization	1942-06-01	157/4527	0.00294745	ADAM10/PDCD5/NSFL1C/FKBP1A/CSRP3/YIPF5	6
GO:0046466	membrane lipid catabolic process	1942-02-01	2022-10-27	0.00360767	ASAH1/MGST2	2
GO:0034612	response to tumor necrosis factor	1942-03-01	35/4527	0.00395446	ASAH1/ADAM10/UBE2K	3
GO:1905475	regulation of protein localization to membrane	1942-03-01	36/4527	0.00428631	ADAM10/PDCD5/CSRP3	3
GO:0042987	amyloid precursor protein catabolic process	1942-02-01	2022-11-27	0.00438351	ADAM10/FKBP1A	2
GO:0042982	amyloid precursor protein metabolic process	1942-02-01	2022-12-27	0.00522937	ADAM10/FKBP1A	2
GO:0006536	glutamate metabolic process	1942-02-01	13/4527	0.00614396	HAL/AMDHD1	2
GO:0060337	type I interferon signaling pathway	1942-02-01	13/4527	0.00614396	CNOT7/UBE2K	2
GO:0071357	cellular response to type I interferon	1942-02-01	13/4527	0.00614396	CNOT7/UBE2K	2
GO:0090068	positive regulation of cell cycle process	1942-03-01	44/4527	0.00755257	NSFL1C/E2F8/SLF1	3
GO:0046456	icosanoid biosynthetic process	1942-02-01	15/4527	0.00817417	MGST2/LTA4H	2
GO:0051346	negative regulation of hydrolase activity	1942-04-01	90/4527	0.00918919	PSMF1/FKBP1A/MGC133636/LOC617402	4
GO:0001889	liver development	1942-02-01	16/4527	0.00928727	FGL1/E2F8	2
GO:0061008	hepaticobiliary system development	1942-02-01	16/4527	0.00928727	FGL1/E2F8	2
GO:0052548	regulation of endopeptidase activity	1942-04-01	95/4527	0.0110735	PDCD5/PSMF1/MGC133636/LOC617402	4
GO:0034340	response to type I interferon	1942-02-01	18/4527	0.0117033	CNOT7/UBE2K	2
GO:0006508	proteolysis	1942-09-01	417/4527	0.0124744	ADAM10/GZMB/UBE2K/PDCD5/PSMF1/MGC133636/LOC617402/YIPF5/LTA4H	9
GO:0043009	chordate embryonic development	1942-04-01	99/4527	0.0127494	ADAM10/SMIM14/E2F8/LIAS	4
GO:0009792	embryo development ending in birth or egg hatching	1942-04-01	102/4527	0.0141079	ADAM10/SMIM14/E2F8/LIAS	4
GO:0032880	regulation of protein localization	1942-05-01	159/4527	0.0149446	ADAM10/PDCD5/NSFL1C/FKBP1A/CSRP3	5
GO:0034097	response to cytokine	1942-05-01	161/4527	0.0157062	ASAH1/CNOT7/ADAM10/UBE2K/FKBP1A	5
GO:0052547	regulation of peptidase activity	1942-04-01	107/4527	0.0165717	PDCD5/PSMF1/MGC133636/LOC617402	4
GO:0030162	regulation of proteolysis	1942-05-01	166/4527	0.0177235	UBE2K/PDCD5/PSMF1/MGC133636/LOC617402	5
GO:0009790	embryo development	1942-05-01	167/4527	0.0181468	ADAM10/SMIM14/UGDH/E2F8/LIAS	5
GO:0072657	protein localization to membrane	1942-04-01	112/4527	0.0192918	ADAM10/PDCD5/CSRP3/GLRB	4
GO:0045787	positive regulation of cell cycle	1942-03-01	63/4527	0.0200548	NSFL1C/E2F8/SLF1	3
GO:1904375	regulation of protein localization to cell periphery	1942-02-01	24/4527	0.0203841	ADAM10/CSRP3	2
GO:0010951	negative regulation of endopeptidase activity	1942-03-01	64/4527	0.0209073	PSMF1/MGC133636/LOC617402	3
GO:0051604	protein maturation	1942-03-01	64/4527	0.0209073	ADAM10/YIPF5/LIAS	3
GO:0030203	glycosaminoglycan metabolic process	1942-02-01	25/4527	0.0220278	UGDH/LYVE1	2
GO:0010466	negative regulation of peptidase activity	1942-03-01	67/4527	0.0235841	PSMF1/MGC133636/LOC617402	3
GO:0001959	regulation of cytokine-mediated signaling pathway	1942-02-01	26/4527	0.0237247	CNOT7/UBE2K	2
GO:0006022	aminoglycan metabolic process	1942-02-01	26/4527	0.0237247	UGDH/LYVE1	2
GO:0043648	dicarboxylic acid metabolic process	1942-02-01	26/4527	0.0237247	HAL/AMDHD1	2
GO:0099173	postsynapse organization	1942-02-01	26/4527	0.0237247	ADAM10/GLRB	2
GO:1901565	organonitrogen compound catabolic process	1942-07-01	314/4527	0.0237579	ASAH1/UBE2K/PSMF1/LYVE1/HAL/AMDHD1/LTA4H	7
GO:0033365	protein localization to organelle	1942-05-01	182/4527	0.0253233	ADAM10/PDCD5/NSFL1C/CSRP3/SLF1	5
GO:0002687	positive regulation of leukocyte migration	1942-02-01	28/4527	0.0272741	ADAM10/LYVE1	2
GO:0001701	in utero embryonic development	1942-03-01	71/4527	0.0274307	ADAM10/SMIM14/E2F8	3
GO:0051668	localization within membrane	1942-04-01	125/4527	0.0276135	ADAM10/PDCD5/CSRP3/GLRB	4
GO:0009064	glutamine family amino acid metabolic process	1942-02-01	29/4527	0.0291244	HAL/AMDHD1	2
GO:0060759	regulation of response to cytokine stimulus	1942-02-01	29/4527	0.0291244	CNOT7/UBE2K	2
GO:0051336	regulation of hydrolase activity	1942-05-01	192/4527	0.0310081	PDCD5/PSMF1/FKBP1A/MGC133636/LOC617402	5
GO:0048738	cardiac muscle tissue development	1942-02-01	31/4527	0.0329712	FKBP1A/CSRP3	2
GO:0006690	icosanoid metabolic process	1942-02-01	32/4527	0.0349656	MGST2/LTA4H	2
GO:0071356	cellular response to tumor necrosis factor	1942-02-01	32/4527	0.0349656	ASAH1/UBE2K	2
GO:0019752	carboxylic acid metabolic process	1942-06-01	270/4527	0.0365246	ASAH1/UGDH/MGST2/HAL/AMDHD1/LTA4H	6
GO:0043603	cellular amide metabolic process	1942-07-01	344/4527	0.0367879	ASAH1/CNOT7/MGST2/YIPF5/HAL/AMDHD1/LTA4H	7
GO:0043436	oxoacid metabolic process	1942-06-01	271/4527	0.0370961	ASAH1/UGDH/MGST2/HAL/AMDHD1/LTA4H	6
GO:0043933	protein-containing complex organization	1942-08-01	426/4527	0.0391243	ADAM10/LIPC/STXBP6/UBE2K/UGDH/FKBP1A/SLF1/SNRPF	8
GO:0019221	cytokine-mediated signaling pathway	1942-03-01	82/4527	0.0396366	CNOT7/UBE2K/FKBP1A	3
GO:0006082	organic acid metabolic process	1942-06-01	277/4527	0.0406478	ASAH1/UGDH/MGST2/HAL/AMDHD1/LTA4H	6
GO:0014706	striated muscle tissue development	1942-02-01	35/4527	0.0412209	FKBP1A/CSRP3	2
GO:0002682	regulation of immune system process	1942-06-01	282/4527	0.0437701	FGL1/CNOT7/ADAM10/UBE2K/FKBP1A/LYVE1	6
GO:0032269	negative regulation of cellular protein metabolic process	1942-05-01	212/4527	0.0446673	CNOT7/PSMF1/FKBP1A/MGC133636/LOC617402	5
GO:0071345	cellular response to cytokine stimulus	1942-04-01	147/4527	0.0459929	ASAH1/CNOT7/UBE2K/FKBP1A	4
GO:0007162	negative regulation of cell adhesion	1942-02-01	38/4527	0.0478644	FGL1/ADAM10	2
GO:0044272	sulfur compound biosynthetic process	1942-02-01	38/4527	0.0478644	UGDH/MGST2	2
